# Supplementary material for: Functional characterization of a ‘plant-like’ HYL1 homolog in the cnidarian Nematostella vectensis indicates a conserved involvement in microRNA biogenesis
Source: eLife journal article supplement (doi:10.7554/elife.69464), 2022-03-15
Supplement: supp [file elife_poa_e69464_Figure_5_figure_supplement_3.pdf › elife_poa_e69464_Figure_5_figure_supplement_3.pdf]

### >nve-mir-2022

AGCGTGGGGATGCAGACAGATAATCTCGGGATGAGTTCGCCTGAATGATCAAGATGAGT  
TCGCCTGAAAGTCGGGATGAGATCGCCTGAGAGTCGGGATAAGATCGCCTGAAAGTCGG  
GATAAATCAACTGTCAAGTGGTTGTCAATTTGCTAGTTGCTTTTGTCCCGCCTTTTCTGCGA  
ATTGATCACGTGATGTGACGTCACTGCCCAATTACAAATGCTGCAATATATTGAGGT  
ACGTAAACGTTAGATGTTGCGCATATACCTCATACG

### >nve-mir-2023

GACTAGCTCAGTGGATCGACTAATTGGGGAATGGGCTATAGAAGACGACGATTACTATC  
AAAATAGCTCAGTGGGCCAAGTACTGGAGCCAGACGAGAAGAGTTGCGTGACATACCT  
GTGTCTGCCACCTGTATTTCTATCACGTCAGATGAAAGAAGTACAAGTGGTAGGGAAGG  
GTGTGTCGATTGACAATTGGCGGCTTATCAAGACACGACCAATGTTGTAAGGGAGGAGGT  
AGATATACAAGAATGCAGCAGAAATAGTTTACAAGCTTCGAGGTAAGGGAGGGAGTA

### >nve-mir-2024a

CAAGAGCGATCGAGCACACGTGAGTCAGAATATTGCTTATGTTCTATAAGTATTCCTGGT  
AATTTTGAGGAGGCGATGTAACTCTACCAACAAGTGCTACTGCTTCAAAATATCGGTGTT  
GGGTAAAGGTCACATTTACACAGTACCGATATTGTGAAGCACGTTTGCTTAGGAACT  
AGGATACAACGAGGAGGCAAATTAAAGCTACCAACAAGCGCTGTAACTCCACACGAAG  
ACAGGTAACGAGAGAAATCAAGCCCG

### >nve-mir-2025

GTAAAAGCATGTATGTGTTTTAACGCTAGTGCAGTAGCAAAACTACAACCGGGAGTGGA  
GACCCAAAAGGCGTTCATGTCGACACAGCAAGAATATGATCAACAATTAGGCCACATAC  
AAAGCTTTCGATGGCTAGAAATCCTTAGTGATTTTTTAGCCCGCGGAAGTTGTGTTGCC  
TGGCCAATATTACCATTAGGGTGAAGGCAATGATCAAGACGAGGTTGTACTGGAAGACG  
CGAAGGCTGTTTATTATATTACAGTATAAGGGTAAGAAACATCGGTACTTTGAAGG

### >nve-mir-2027

CCTTGGAATCTCTCAGCTTCAAGAGCAGCAGCAAGCCCCTAGTAATTGATGTATTCAGTT  
TGTTTTCAAACAAGATAGAGTGCACACCTCAGATCTTTCAATCCGAGAGCCTTAAGGCT  
TGCTTGTTGGTAATTTTGCATCTGTTGCACATGCGATTTTACCAAAATGCAATTCTTAT  
GGTTCAGTGATCAGGAACCCAATAACTGCAGCACAGTTGTCTGATATCGGTGCATGAAA  
CTGATAGTCACTACAGTTTTTAAATTCATCTAATATAATAACTTCCAAGGGCTTATTT
