# Supplementary figures and images for: Functional characterization of a ‘plant-like’ HYL1 homolog in the cnidarian Nematostella vectensis indicates a conserved involvement in microRNA biogenesis
Source: eLife journal article supplement (doi:10.7554/elife.69464), 2022-03-15

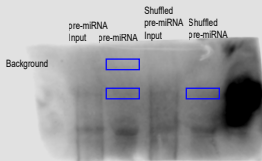

Supplement: data1 [file elife-69464-data1-v2.zip]

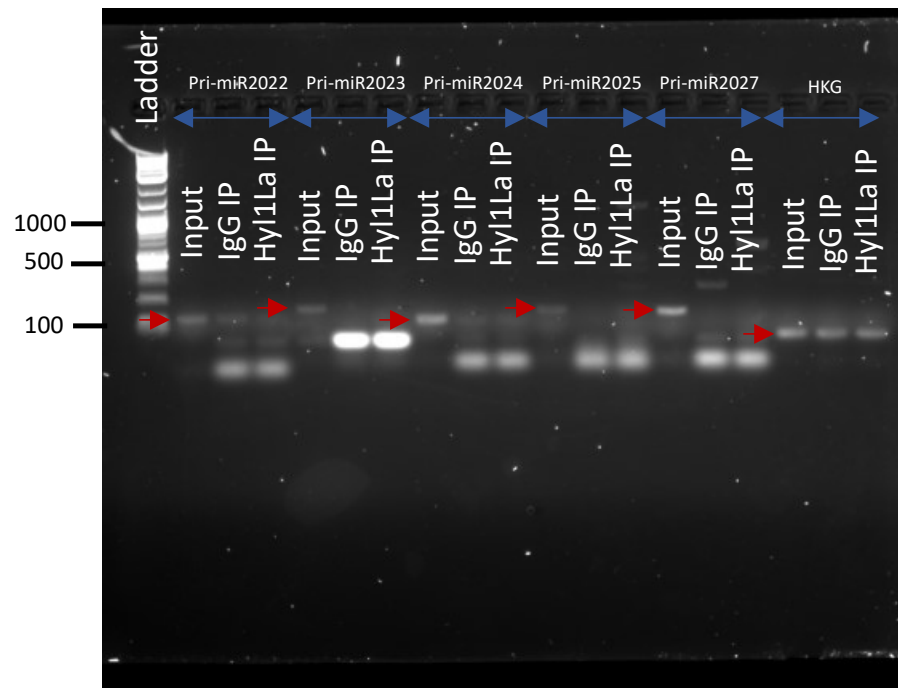

Supplement: data1 [file elife-69464-data1-v2.zip]

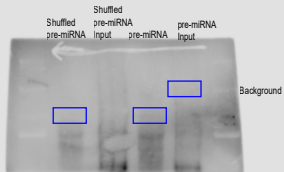

Supplement: data1 [file elife-69464-data1-v2.zip]

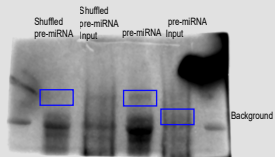

Supplement: data1 [file elife-69464-data1-v2.zip]

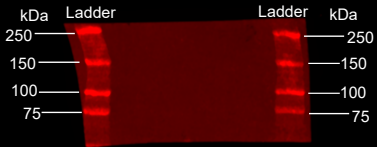

Supplement: data1 [file elife-69464-data1-v2.zip]

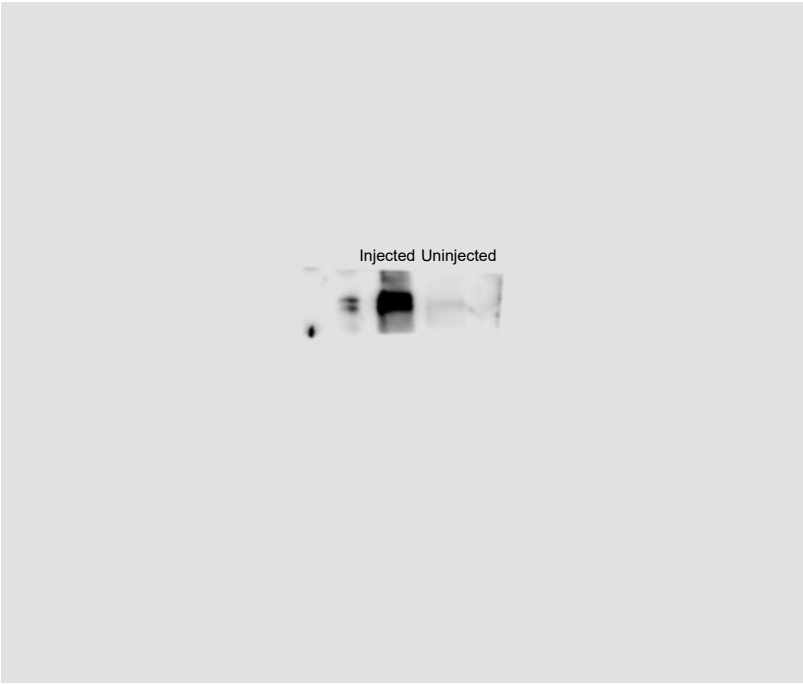

Supplement: data1 [file elife-69464-data1-v2.zip]

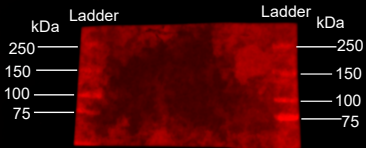

Supplement: data1 [file elife-69464-data1-v2.zip]

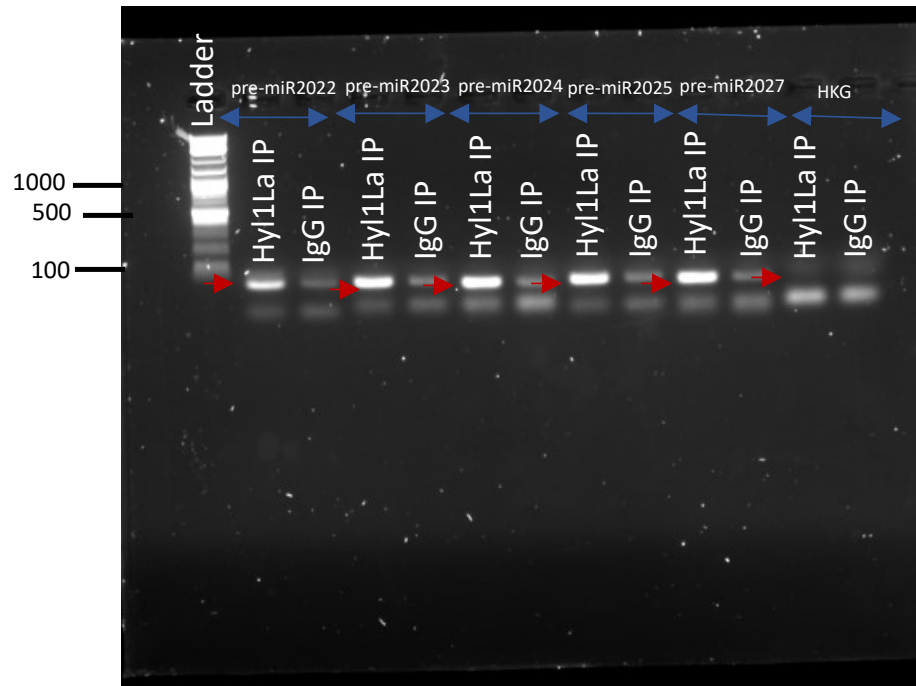

Supplement: data1 [file elife-69464-data1-v2.zip]

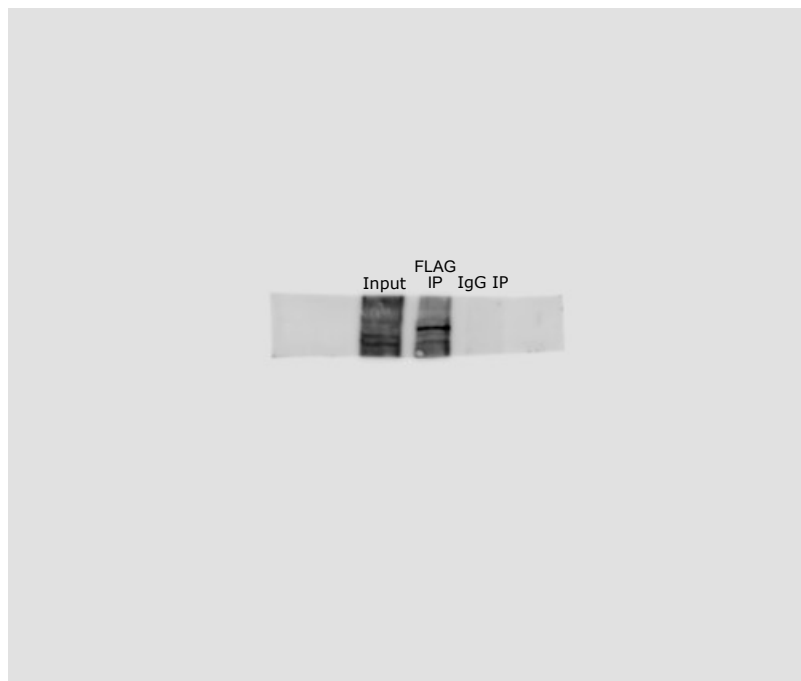

Supplement: data1 [file elife-69464-data1-v2.zip]

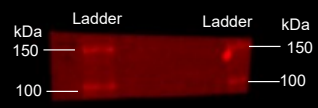

Supplement: data1 [file elife-69464-data1-v2.zip]

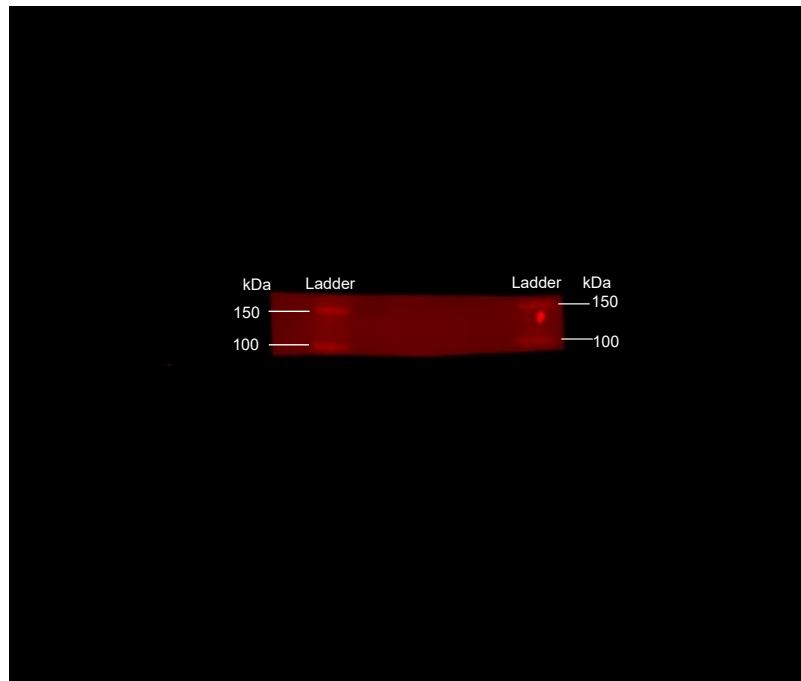

Supplement: data1 [file elife-69464-data1-v2.zip]

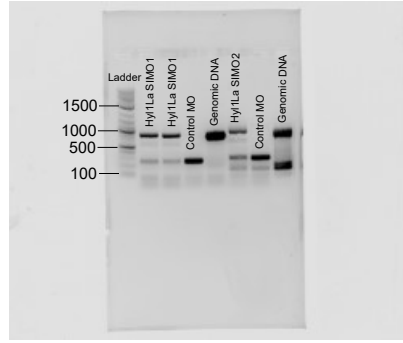

Supplement: data1 [file elife-69464-data1-v2.zip]

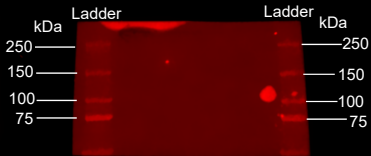

Supplement: data1 [file elife-69464-data1-v2.zip]

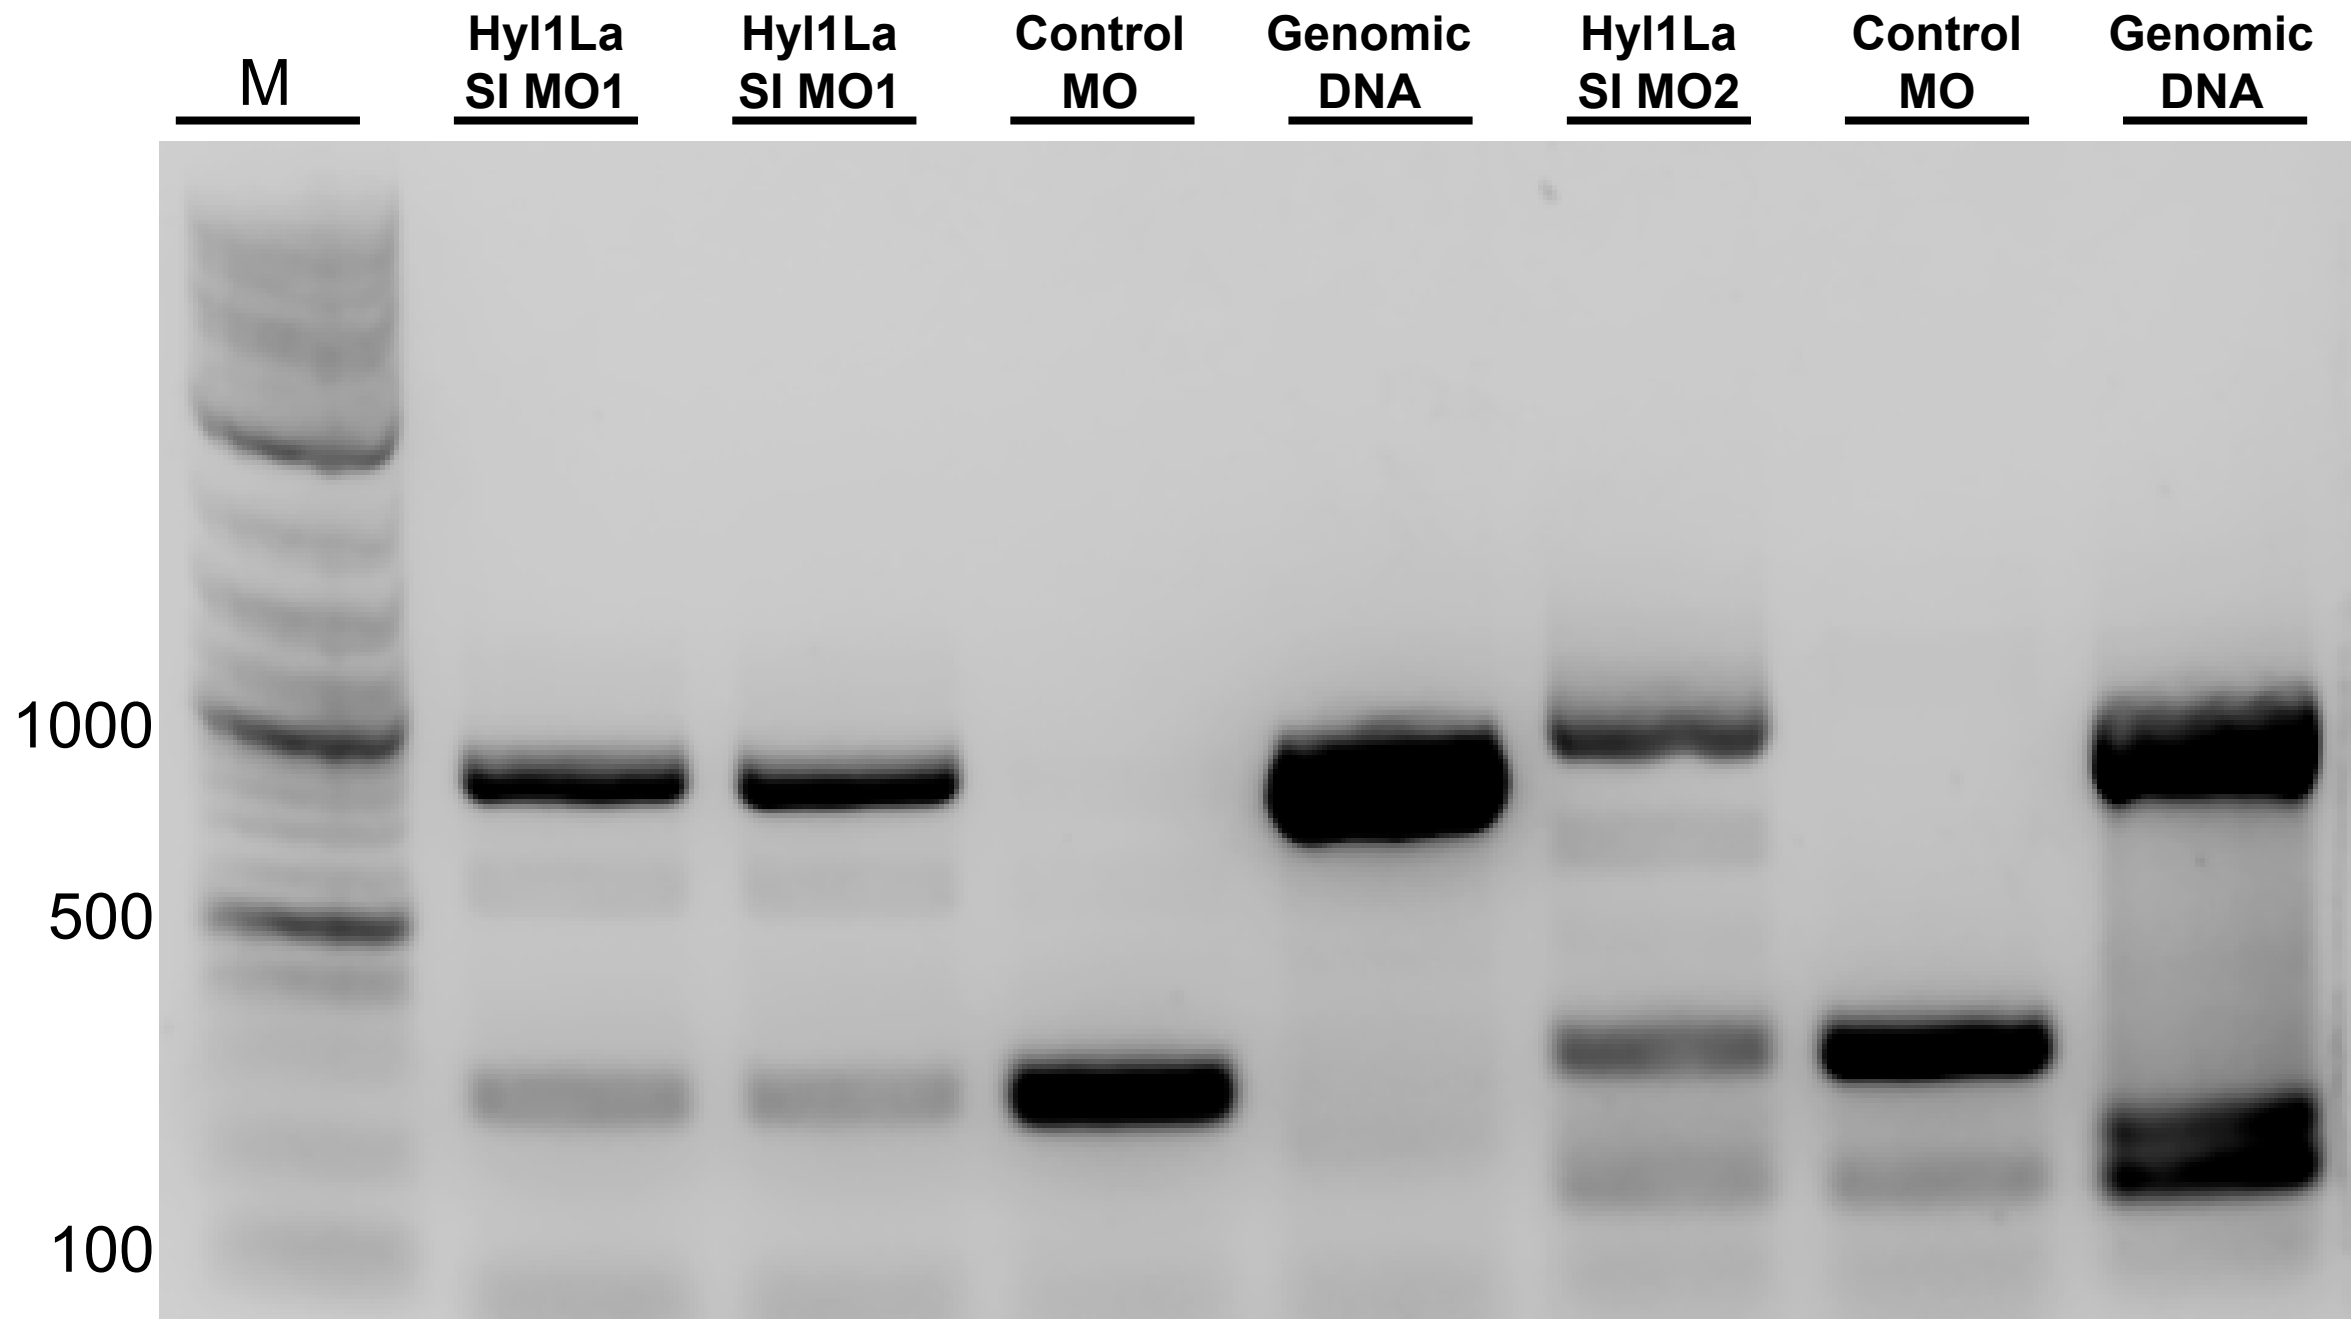

Supplement: supp [file elife_poa_e69464_Figure_2_figure_supplement_1.pdf › elife_poa_e69464_Figure_2_figure_supplement_1.pdf]

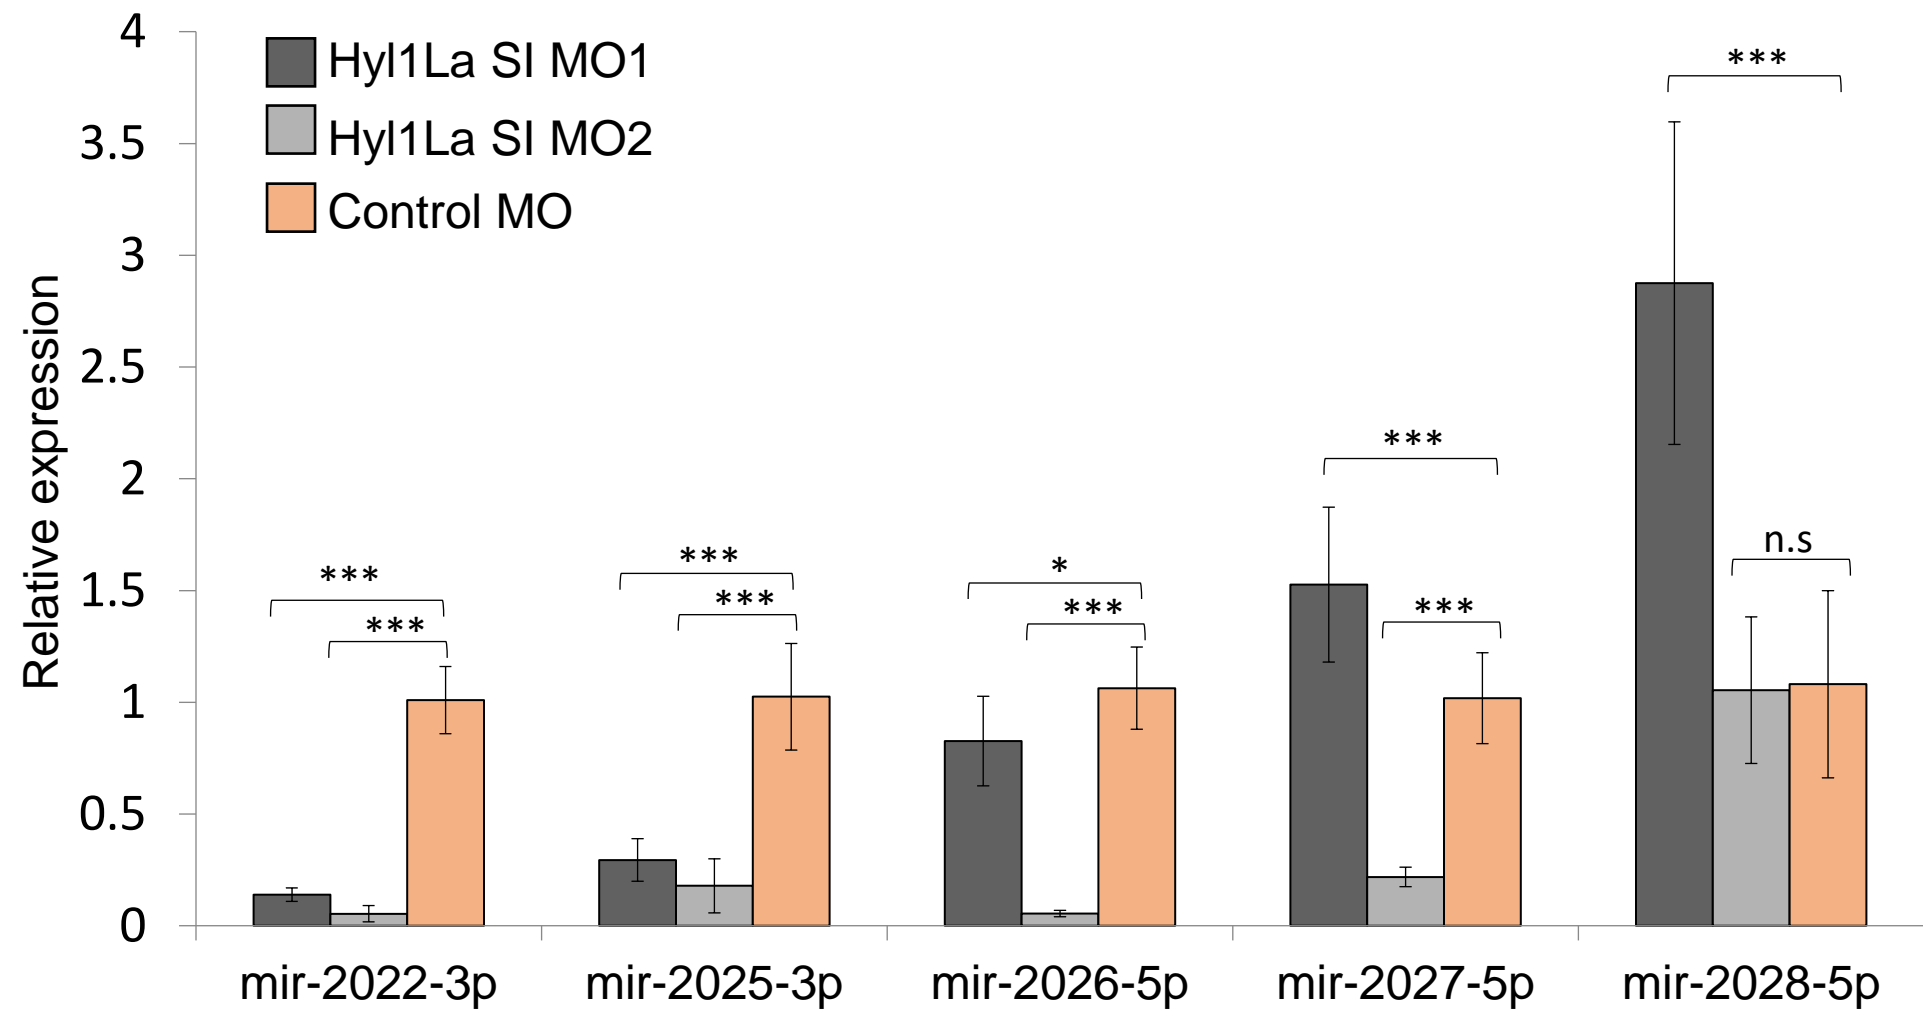

Supplement: supp [file elife_poa_e69464_Figure_3_figure_supplement_1.pdf › elife_poa_e69464_Figure_3_figure_supplement_1.pdf]

A

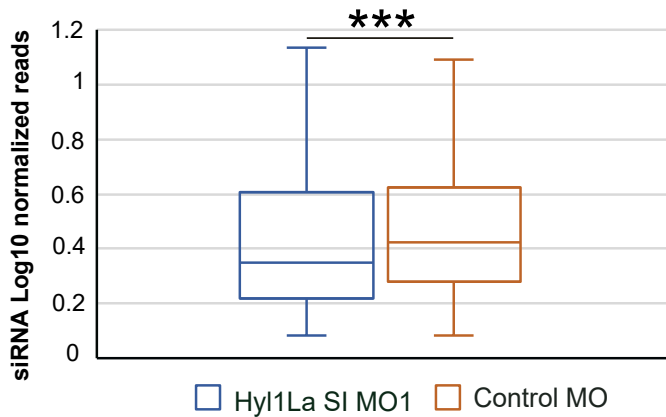

B

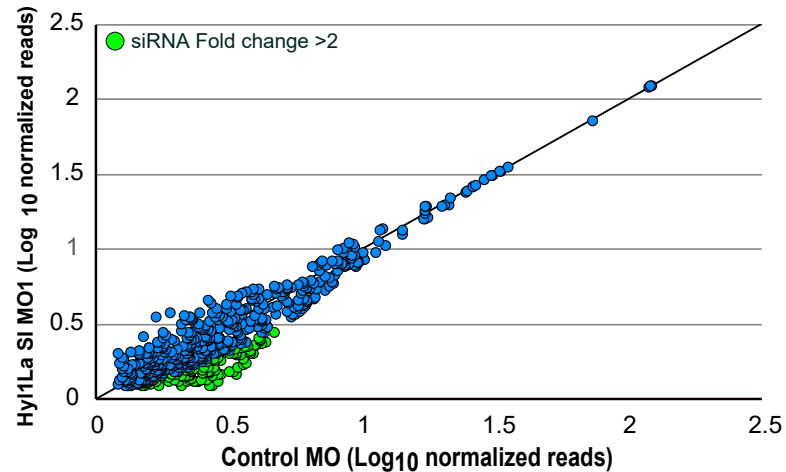

C

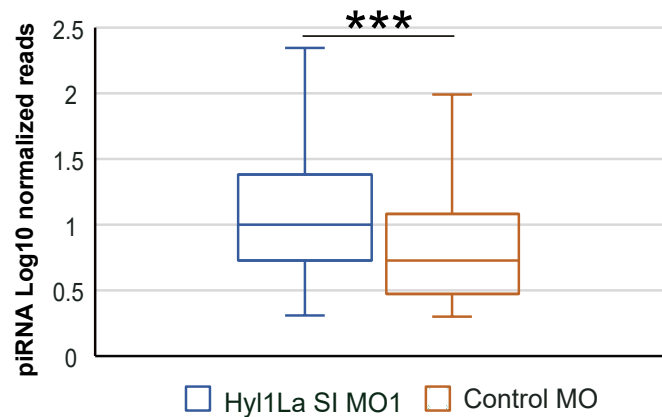

D

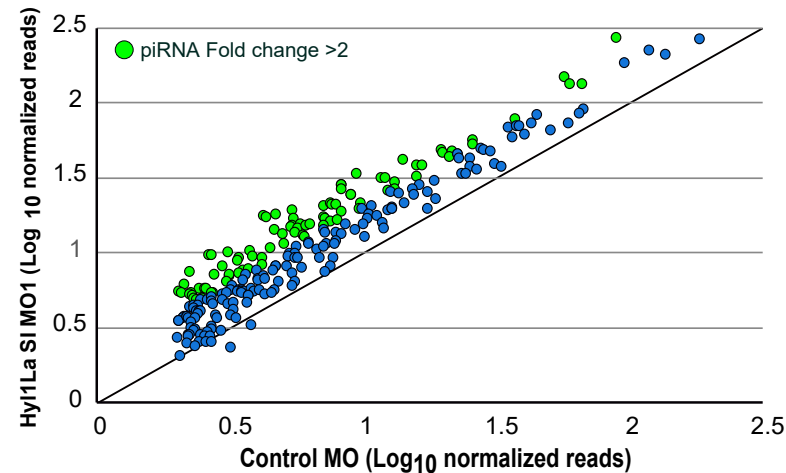

Supplement: supp [file elife_poa_e69464_Figure_3_figure_supplement_2.pdf › elife_poa_e69464_Figure_3_figure_supplement_2.pdf]

# A

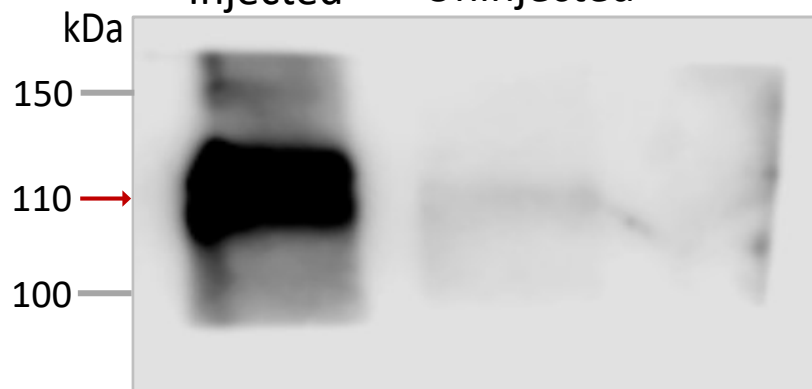

# B

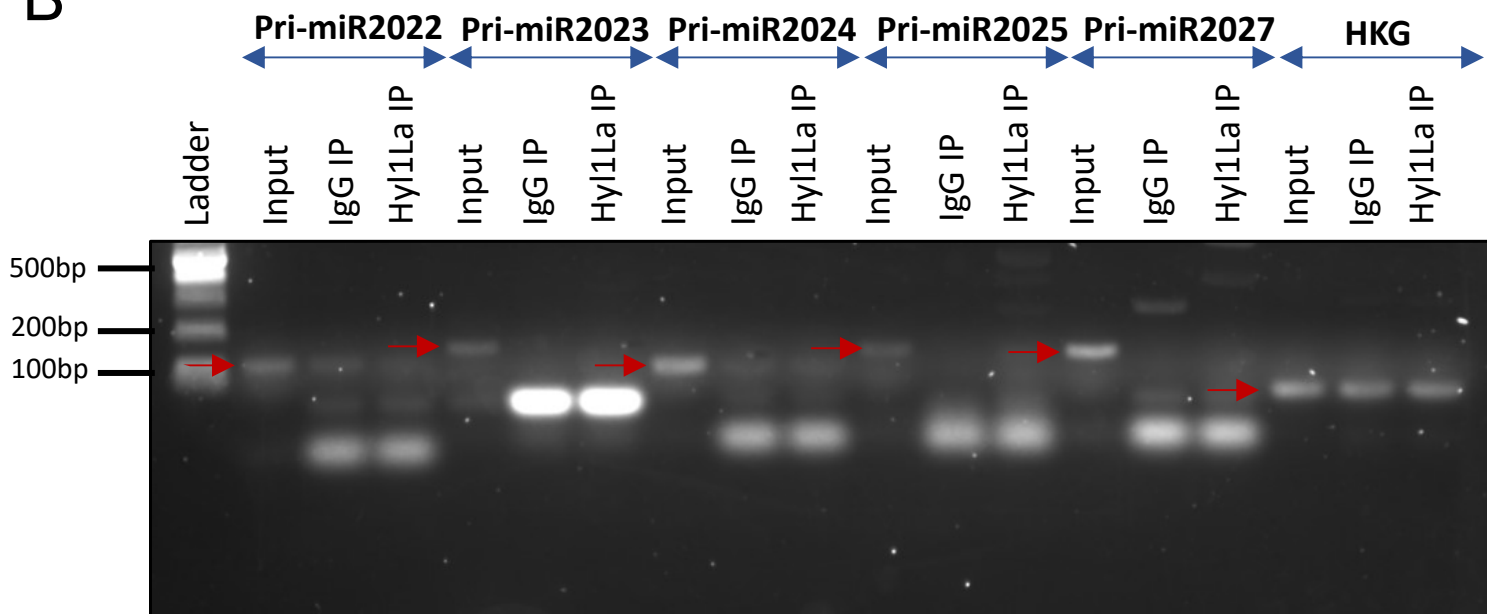

# C

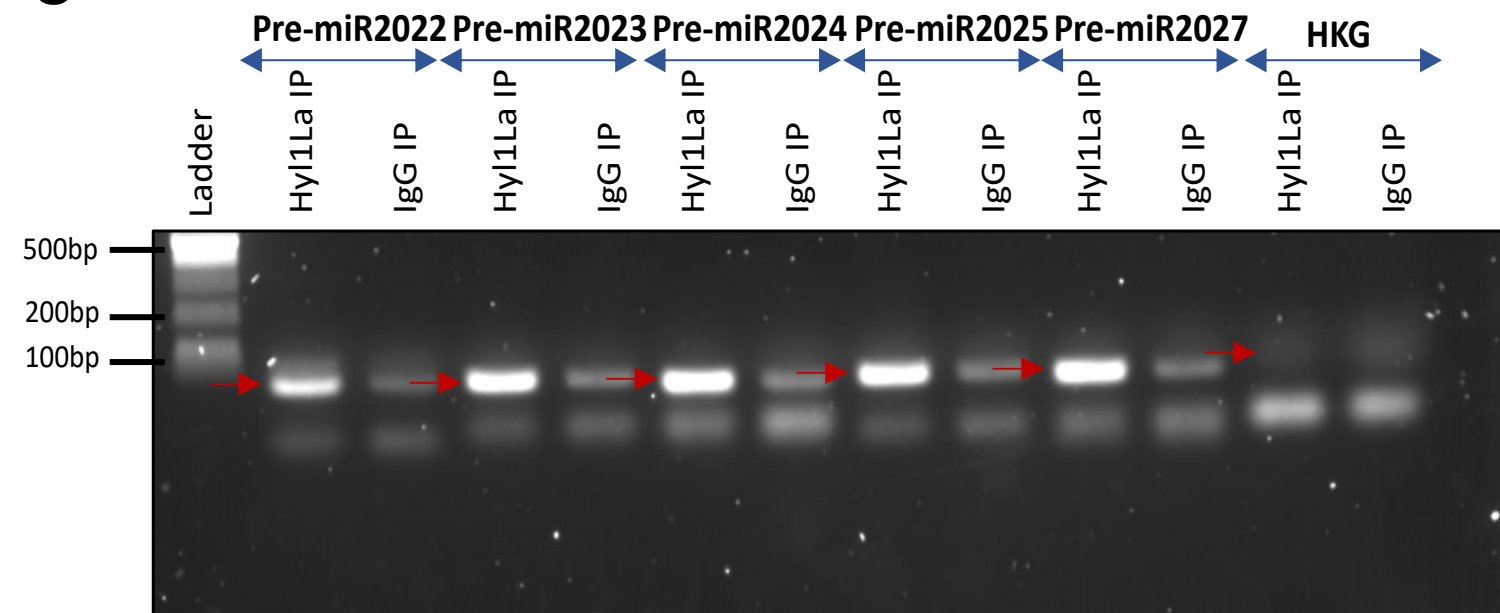

Supplement: supp [file elife_poa_e69464_Figure_5_figure_supplement_1.pdf › elife_poa_e69464_Figure_5_figure_supplement_1.pdf]

pre-miR2022

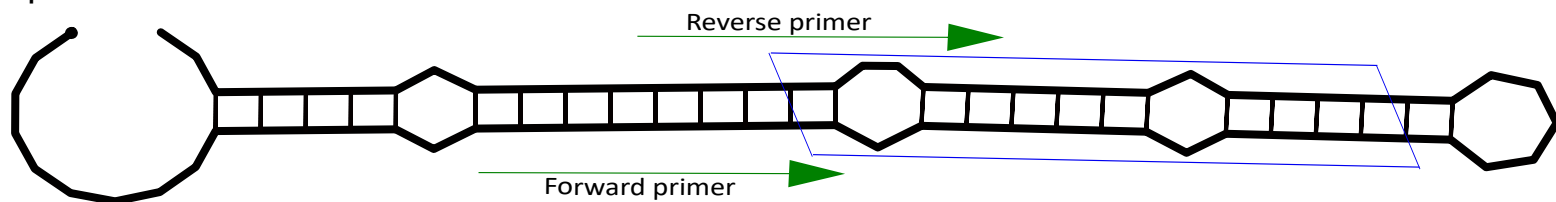

pre-miR2023

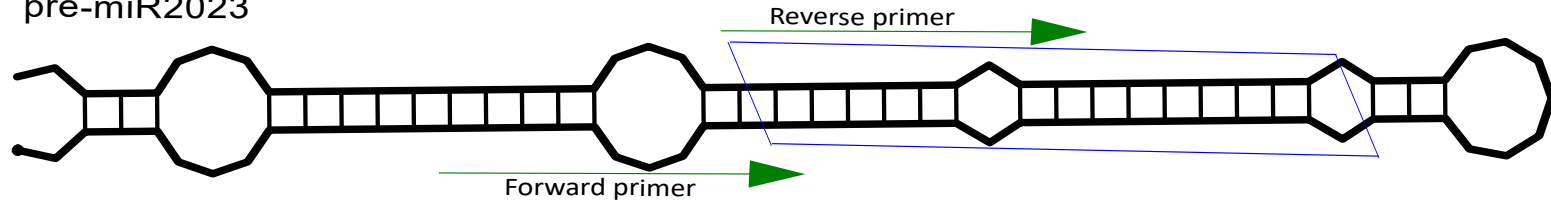

pre-miR2024a

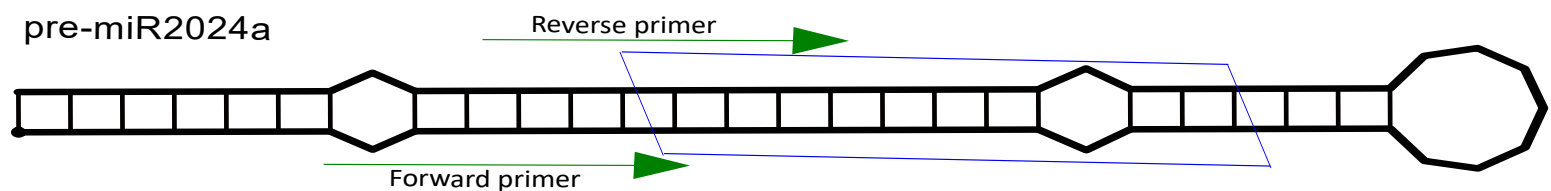

pre-miR2025

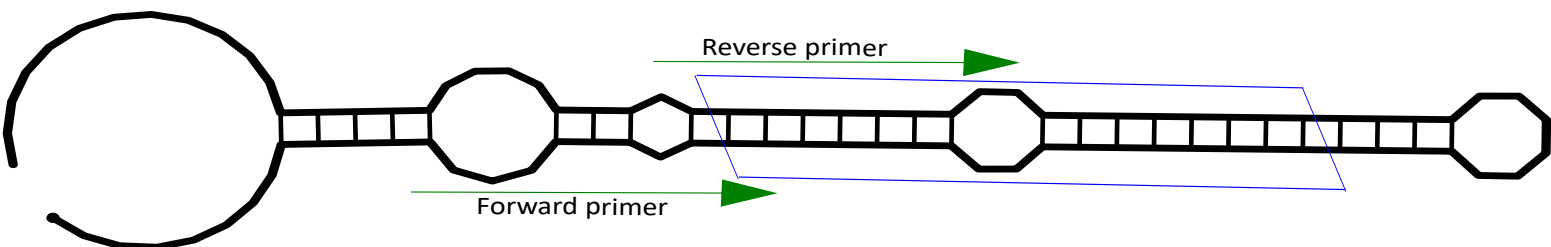

pre-miR2027

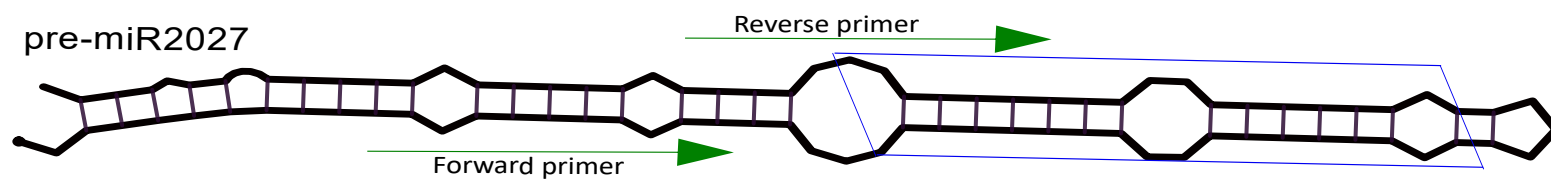

pre-miR2029

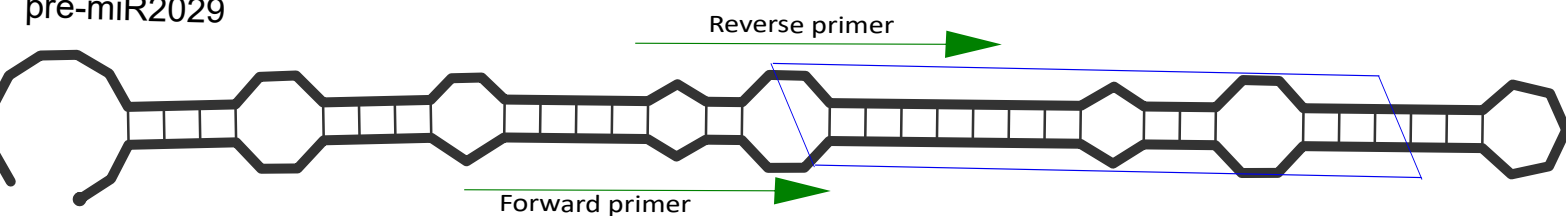

pre-miR2030

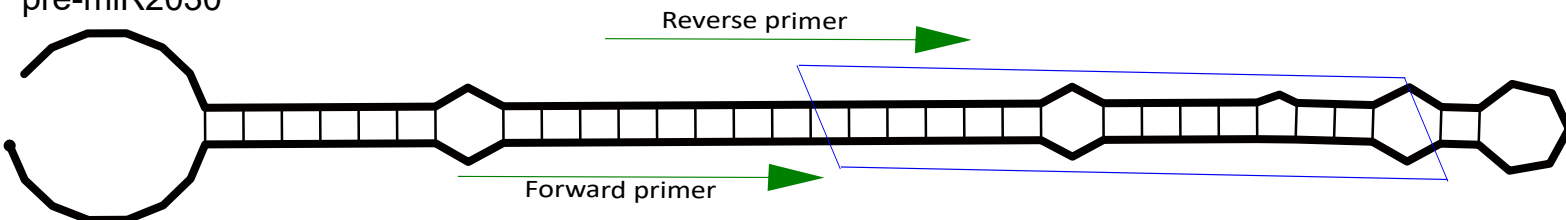

pre-miR2035-1

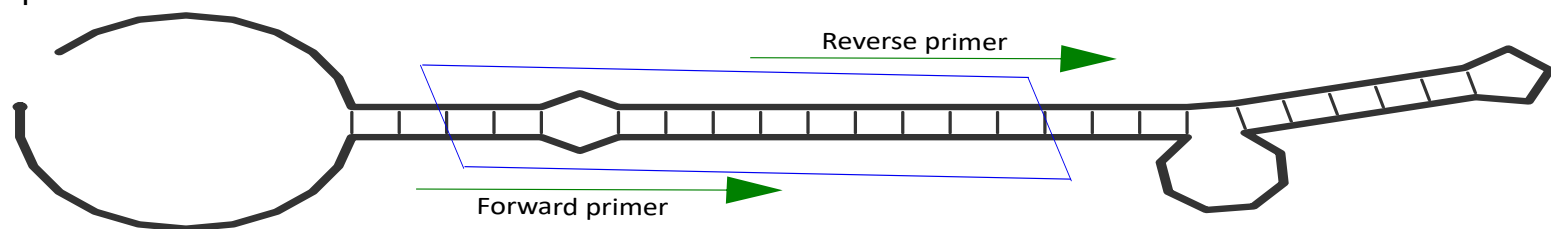

Supplement: supp [file elife_poa_e69464_Figure_5_figure_supplement_2.pdf › elife_poa_e69464_Figure_5_figure_supplement_2.pdf]

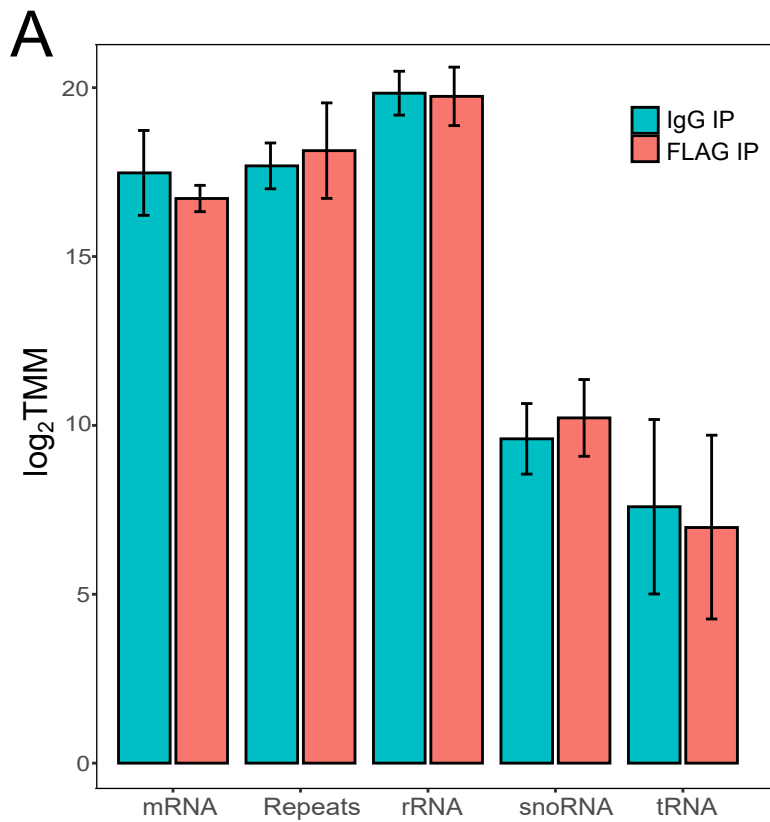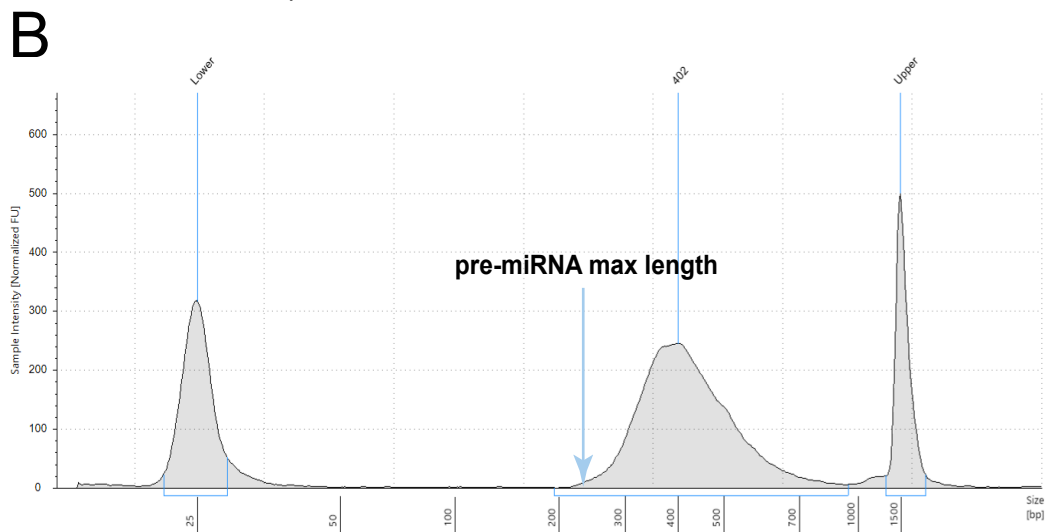

Supplement: supp [file elife_poa_e69464_Figure_5_figure_supplement_4.pdf › elife_poa_e69464_Figure_5_figure_supplement_4.pdf]
